# Supplementary material
Source: publisher figshare collection journal article supplement (https://sage.figshare.com/ndownloader/files/17430386)
Supplement: Supplementary file 1 [file 17430386]

sorry	my	co	co
my	darling	co	co
oop		co
have	you	aux	pro:per
you	get&PAST	pro:per	v
get&PAST	a	v	det:art
a	cough	det:art	n
Mummy	be&3S	n:prop	aux
be&3S	go-PRESP	aux	part
go-PRESP	to	part	prep
to	the	prep	det:art
the	toilet	det:art	n
toilet	darling	n	co
hello	darling	co	co
yeah	Mama	co	n:prop
Mama	be&3S	n:prop	aux
be&3S	go-PRESP	aux	part
go-PRESP	to	part	inf
to	take	inf	v
take	your	v	det:poss
your	nappie	det:poss	n
nappie	off	n	adv
oop		co
bad	cough	adj	n
oh		co
so	you	adv	pro:per
you	have	pro:per	aux
have	get&PASTP	aux	part
get&PASTP	a	part	det:art
a	bad	det:art	adj
bad	cough	adj	n
so	do	adv	mod
do	not	mod	neg
not	touch	neg	v
touch	the	v	det:art
the	clock	det:art	n
clock	good	n	adj
good	girl	adj	n
girl	because	n	conj
because	it	conj	pro:per
it	will&COND	pro:per	mod
will&COND	break	mod	v
break	if	v	conj
if	you	conj	pro:per
you	touch	pro:per	v
touch	the	v	det:art
the	clock	det:art	n
ah		co
yes		co
we	know	pro:sub	v
know	they	v	pro:sub
they	be&PRES	pro:sub	aux
be&PRES	yours	aux	pro:poss
yours	darling	pro:poss	co
be&3S	that	cop	pro:dem
that	good&CP	pro:dem	adj
you	know	pro:per	v
know	where	v	pro:rel
where	be&3S	pro:rel	aux
be&3S	Eleanor	aux	n:prop
Eleanor	go-PRESP	n:prop	part
go-PRESP	today	part	adv:tem
who	you	pro:int	pro:per
you	go-PRESP	pro:per	part
go-PRESP	to	part	inf
to	see	inf	v
the	Tweenies	det:art	n:prop
luck&dn-Y	girl	adj	n
you	go-PRESP	pro:per	part
go-PRESP	with	part	prep
dad		n
the	Tweenies	det:art	n:prop
Tweenies	be&PRES	n:prop	aux
be&PRES	go-PRESP	aux	part
go-PRESP	to	part	inf
to	sing	inf	v
sing	on	v	prep
on	stage	prep	n
oh	Eleanor	co	n:prop
Eleanor	can	n:prop	n
can	Mama	n	n:prop
Mama	come	n:prop	v
oh		co
oh	please	co	co
but	Mama	conj	n:prop
Mama	want-3S	n:prop	v
want-3S	to	v	inf
to	see	inf	v
see	the	v	det:art
the	Tweenies	det:art	n:prop
Tweenies	as	n:prop	conj
as	well	conj	adv
alright		co
oh	Mama	co	n:prop
Mama	be	n:prop	cop
be	by	cop	prep
by	herself	prep	pro:refl
herself	then	pro:refl	adv:tem
get	some	v	qn
some	cream	qn	n
you	be&PRES	pro:per	cop
be&PRES	welcome	cop	adj
welcome	my	adj	det:poss
my	darling	det:poss	co
Eleanor		n:prop
there	you	adv	pro:per
you	go	pro:per	v
Eleanor		n:prop
not	in	neg	prep
in	your	prep	det:poss
your	mouth	det:poss	n
mouth	please	n	co
please	you	co	pro:per
you	do	pro:per	mod
do	not	mod	neg
not	put&ZERO	neg	v
put&ZERO	cream	v	n
cream	in	n	prep
in	your	prep	det:poss
your	mouth	det:poss	n
Eleanor	what	n:prop	pro:int
what	do&PAST	pro:int	mod
do&PAST	Mama	mod	n:prop
Mama	say	n:prop	v
no	cream	qn	n
cream	in	n	prep
in	your	prep	det:poss
your	mouth	det:poss	n
mouth	please	n	co
it	be&3S	pro:per	cop
be&3S	dangerous	cop	adj
it	be&3S	pro:per	cop
be&3S	not	cop	neg
not	love&dn-LY	neg	adj
you	do	pro:per	mod
do	not	mod	neg
not	eat	neg	v
eat	cream	v	n
shh		co
Dada	be&3S	n:prop	aux
be&3S	go&PASTP	aux	part
go&PASTP	to	part	prep
to	the	prep	det:art
the	gym	det:art	n
gym	darling	n	co
Eleanor	Dada	n:prop	n:prop
Dada	s	n:prop	poss
s	go&PASTP	poss	part
go&PASTP	to	part	prep
to	the	prep	det:art
the	gym	det:art	n
Dada	be&3S	n:prop	aux
be&3S	go&PASTP	aux	part
go&PASTP	to	part	prep
to	the	prep	det:art
the	gym	det:art	n
gym	my	n	det:poss
my	darling	det:poss	co
you	come	pro:per	v
come	here	v	adv
oh	thank	co	v
thank	you	v	pro:per
for	what	conj	pro:int
what	be&3S	pro:int	cop
be&3S	this	cop	pro:dem
sorry	darling	co	co
no	that	co	pro:dem
that	be&3S	pro:dem	cop
be&3S	a	cop	det:art
a	new	det:art	adj
that	be&3S	pro:dem	cop
be&3S	sick	cop	adj
okay		co
I	will	pro:sub	mod
will	get	mod	v
get	a	v	det:art
a	clean	det:art	adj
clean	one	adj	pro:indef
be&3S	this	cop	pro:dem
this	a	pro:dem	det:art
a	nice	det:art	adj
nice	one	adj	pro:indef
smell		n
that	be&3S	pro:dem	cop
be&3S	nice	cop	adj
Eleanor		n:prop
Eleanor	listen	n:prop	v
listen	to	v	prep
to	me	prep	pro:obj
put&ZERO	your	v	det:poss
your	vest	det:poss	n
vest	on	n	adv
on	because	adv	conj
because	you	conj	pro:per
you	know	pro:per	v
know	outside	v	adv
outside	it	adv	pro:per
it	be&3S	pro:per	cop
be&3S	very	cop	adv
very	cold	adv	adv
Mr	nice	n:prop	adj
nice	clean	adj	adj
it	be&3S	pro:per	aux
be&3S	not	aux	neg
it	be&3S	pro:per	aux
be&3S	not	aux	neg
it	be&3S	pro:per	aux
be&3S	out	aux	adv
out	of	adv	prep
of	the	prep	det:art
the	drawer	det:art	n
drawer	that	n	pro:rel
that	one	pro:rel	det:num
one	darling	det:num	co
it	be&3S	pro:per	cop
be&3S	clean	cop	adj
oh	this	co	pro:dem
this	be&3S	pro:dem	cop
be&3S	beautiful	cop	adj
oh	okay	co	co
okay	darling	co	co
dada	be&3S	n	aux
be&3S	go&PASTP	aux	part
go&PASTP	to	part	prep
to	the	prep	det:art
the	gym	det:art	n
gym	darling	n	co
exercise		n
be&3S	that	cop	pro:dem
that	paint	pro:dem	n
paint	on	n	prep
on	your	prep	det:poss
your	hand	det:poss	n
oh	look	co	co
look	that	co	pro:dem
that	be&3S	pro:dem	cop
be&3S	a	cop	det:art
a	nice	det:art	adj
nice	dress	adj	n
dress	for	n	prep
for	Eleanor	prep	n:prop
do	you	mod	pro:per
you	know	pro:per	v
know	who	v	pro:rel
who	give	pro:rel	v
give	you	v	pro:per
you	that	pro:per	pro:dem
that	dress	pro:dem	n
Auntie	Aktar	n:prop	n:prop
hm		co
she	give&PAST	pro:sub	v
give&PAST	you	v	pro:per
oh	where	co	adv:int
where	be&3S	adv:int	cop
be&3S	the	cop	det:art
the	brush	det:art	n
brush	go&PASTP	n	part
where	be&3S	adv:int	cop
be&3S	Eleanor'sbrush	cop	n:prop
Eleanor'sbrush	go&PASTP	n:prop	part
will	we	mod	pro:sub
we	find	pro:sub	v
find	it	v	pro:per
oh	no	co	co
no	we	co	pro:sub
we	have	pro:sub	aux
have	lose&PAST	aux	v
lose&PAST	Eleanor'sbrush	v	n:prop
have	you	v	pro:per
no	not	co	neg
not	today	neg	adv:tem
today	darling	adv:tem	co
you	know	pro:per	v
know	what	v	pro:int
what	we	pro:int	pro:sub
we	be&PRES	pro:sub	aux
be&PRES	go-PRESP	aux	part
go-PRESP	to	part	inf
to	do	inf	v
do	later	v	adv
later	on	adv	adv
on	today	adv	adv:tem
make	some	v	qn
some	nice	qn	adj
nice	new	adj	adj
new	play	adj	n
play	dough	n	n
there	you	adv	pro:per
you	go	pro:per	v
not	yet	neg	adv
no	not	co	neg
not	now	neg	adv
you	have	pro:per	v
have	to	v	inf
to	have	inf	v
have	your	v	det:poss
your	breakfast	det:poss	n
breakfast	first	n	adv
Eleanor	will&COND	n:prop	mod
will&COND	you	mod	pro:per
you	like	pro:per	v
like	to	v	inf
to	have	inf	v
have	some	v	qn
some	egg	qn	n
egg	and	n	coord
and	toast	coord	n
toast	today	n	adv:tem
today	for	adv:tem	conj
for	breakfast	conj	n
breakfast	yeah	n	co
you	can	pro:per	mod
can	dip	mod	v
dip	the	v	det:art
the	egg	det:art	n
egg	in	n	prep
in	the	prep	det:art
the	bread	det:art	n
you	like	pro:per	prep
like	it	prep	pro:per
it	if	pro:per	conj
if	Mama	conj	n:prop
Mama	make	n:prop	v
make	you	v	pro:per
you	one	pro:per	pro:indef
okay	I	co	pro:sub
I	will	pro:sub	mod
will	make	mod	v
make	it	v	pro:per
it	a	pro:per	det:art
a	nice	det:art	adj
nice	egg	adj	n
okay		co
wait	a	v	det:art
a	minute	det:art	n
yes	darling	co	co
sorry	darling	co	co
you	want	pro:per	v
want	to	v	inf
to	put&ZERO	inf	v
put&ZERO	those	v	pro:dem
those	sock-PL	pro:dem	n
sock-PL	on	n	adv
hm		co
what	do	pro:int	mod
do	you	mod	pro:per
you	say	pro:per	v
say	when	v	conj
when	we	conj	pro:sub
we	put&ZERO	pro:sub	v
put&ZERO	my	v	det:poss
my	sock-PL	det:poss	n
sock-PL	on	n	adv
please		co
ah		co
good	girl	adj	n
this	one	pro:dem	pro:indef
one	be&3S	pro:indef	cop
be&3S	a	cop	det:art
a	left	det:art	n
left	foot	n	n
you	be&PRES	pro:per	aux
be&PRES	a	aux	det:art
a	clever	det:art	adj
clever	little	adj	adj
little	girl	adj	n
girl	be&PRES	n	aux
be&PRES	not	aux	neg
not	you	neg	pro:per
that	there	pro:rel	adv
there	ooh	adv	v
wait	a	v	det:art
a	minute	det:art	n
Mum	put&ZERO	n:prop	v
put&ZERO	her	v	det:poss
her	sock-PL	det:poss	n
sock-PL	on	n	adv
which	foot	pro:rel	n
foot	s	n	poss
s	that	poss	pro:dem
and	her	coord	det:poss
her	slipper-PL	det:poss	n
I	be&1S	pro:sub	aux
be&1S	just	aux	adv
just	go-PRESP	adv	part
go-PRESP	to	part	prep
to	the	prep	det:art
the	toilet	det:art	n
toilet	darling	n	co
can	you	mod	pro:per
you	put&ZERO	pro:per	v
put&ZERO	this	v	pro:dem
this	in	pro:dem	prep
in	the	prep	det:art
the	bin	det:art	n
bin	darling	n	co
thank	you	v	pro:per
oh	look	co	v
look	Eleanor	v	n:prop
Eleanor	what	n:prop	pro:int
what	be&3S	pro:int	cop
be&3S	that	cop	pro:dem
that	darling	pro:dem	co
and	what	coord	pro:int
what	color-PL	pro:int	n
color-PL	can	n	mod
can	you	mod	pro:per
you	see	pro:per	v
see	in	v	prep
in	it	prep	pro:per
ah	do&PAST	co	v
do&PAST	you	v	pro:per
you	make	pro:per	v
how	will&COND	adv:int	mod
will&COND	you	mod	pro:per
you	say	pro:per	v
say	bq	v	bq
bq	I	bq	pro:sub
I	make&PAST	pro:sub	v
make&PAST	it	v	pro:per
it	Mama	pro:per	n:prop
Mama	eq	n:prop	eq
Eleanor	where	n:prop	pro:rel
where	be&PRES	pro:rel	aux
be&PRES	you	aux	pro:per
Eleanor	do	n:prop	mod
do	not	mod	neg
not	do	neg	v
do	that	v	pro:dem
Eleanor		n:prop
be&3S	that	cop	pro:rel
that	your	pro:rel	det:poss
your	jacket	det:poss	n
put&ZERO	your	v	det:poss
your	jacket	det:poss	n
jacket	on	n	adv
then	shall	adv:tem	mod
shall	we	mod	pro:sub
we	make	pro:sub	v
make	a	v	det:art
a	egg	det:art	n
then	we	adv:tem	pro:sub
we	can	pro:sub	mod
can	put&ZERO	mod	v
put&ZERO	toast	v	n
toast	on	n	adv
good&CP	hm	adv	co
it	be&3S	pro:per	aux
be&3S	break&PASTP	aux	part
yeah	we	co	pro:sub
we	will	pro:sub	mod
will	ask	mod	v
ask	Dada	v	n:prop
Dada	to	n:prop	inf
to	fix	inf	v
fix	it	v	pro:per
oh	one	co	det:num
one	egg	det:num	n
egg	leave&PAST	n	v
there	be&3S	pro:exist	cop
be&3S	that	cop	pro:dem
that	one	pro:dem	pro:indef
one	there	pro:indef	adv
you	can	pro:per	mod
can	dip	mod	v
dip	in	v	prep
in	a	prep	det:art
a	egg	det:art	n
egg	today	n	adv:tem
you	can	pro:per	mod
can	dip	mod	n
dip	toast	n	n
toast	in	n	prep
in	a	prep	det:art
a	egg	det:art	n
toast	in	n	prep
in	the	prep	det:art
the	toast&dv-AGT	det:art	n
oh		co
you	will	pro:per	mod
will	spoil	mod	v
spoil	the	v	det:art
the	egg	det:art	n
you	mix	pro:per	v
mix	flour	v	n
flour	with	n	prep
with	it	prep	pro:per
no		co
that	be&3S	pro:dem	cop
be&3S	a	cop	det:art
a	different	det:art	adj
a	wooden	det:art	adj
wooden	spoon	adj	n
shall	we	mod	pro:sub
we	put&ZERO	pro:sub	v
put&ZERO	the	v	det:art
the	egg	det:art	n
egg	in	n	adv
in	now	adv	adv
oh	look	co	co
look	egg	co	n
egg	Eleanor	n	n:prop
now	you	adv	pro:per
you	can	pro:per	mod
can	dip	mod	v
dip	your	v	det:poss
your	what	det:poss	pro:int
what	be&3S	pro:int	aux
be&3S	call-PAST	aux	v
call-PAST	a	v	det:art
a	yolk	det:art	n
yolk	in	n	prep
in	the	prep	det:art
the	egg	det:art	n
okay		co
yolk		n
what	be&3S	pro:int	aux
be&3S	it	aux	pro:per
what	be&3S	pro:int	cop
be&3S	that	cop	pro:dem
a	yolk	det:art	n
yolk	good	n	adj
good	girl	adj	n
egg	yolk	n	n
just	the	adv	det:art
the	one	det:art	pro:indef
one	egg	pro:indef	n
for	a	conj	det:art
a	hour	det:art	n
hour	or	n	coord
or	two	coord	det:num
two	Eleanor'sgoing	det:num	n:prop
Eleanor'sgoing	to	n:prop	inf
to	eat	inf	v
eat	a	v	det:art
a	egg	det:art	n
egg	today	n	adv:tem
today	mm	adv:tem	co
love&dn-LY		adj
do	not	mod	neg
not	touch	neg	v
touch	it	v	pro:per
it	be&3S	pro:per	cop
be&3S	hot	cop	adj
what	be&3S	pro:int	cop
be&3S	this	cop	pro:dem
this	call-PASTP	pro:dem	part
no	but	co	conj
but	what	conj	pro:int
what	s	pro:int	poss
s	the	poss	det:art
the	yellow	det:art	adj
yellow	part	adj	n
part	call-PAST	n	v
yolk		n
what	be&3S	pro:int	aux
be&3S	the	aux	det:art
the	yellow	det:art	adj
yellow	part	adj	n
part	call-PAST	n	v
egg	yolk	n	n
good	girl	adj	n
egg	yolk	n	n
what	be&3S	pro:int	aux
be&3S	it	aux	pro:per
mm		co
it	be&3S	pro:per	cop
be&3S	nice	cop	adj
nice	egg	adj	n
egg	yolk	n	n
mm		co
Eleanor	be&3S	n:prop	cop
be&3S	not	cop	neg
not	it	neg	pro:per
it	a	pro:per	det:art
a	nice	det:art	adj
nice	egg	adj	n
alright	be	co	cop
be	very	cop	adv
very	careful	adv	co
we	will	pro:sub	mod
will	cut&ZERO	mod	v
cut&ZERO	the	v	det:art
the	toast	det:art	v
toast	up	v	adv
up	like	adv	prep
like	this	prep	pro:dem
need	some	v	qn
some	water	qn	n
that	be&3S	pro:dem	cop
be&3S	pasta	cop	n
pasta	darling	n	co
that	be&3S	pro:dem	cop
be&3S	dal	cop	L2
you	take	pro:per	v
take	your	v	det:poss
your	water	det:poss	n
